# Supplementary material for: Agro-Industrial Wastes: A Substrate for Multi-Enzymes Production by Cryphonectria parasitica
Source: MDPI journal article supplement (doi:10.3390/fermentation7040279), 2021-11-26
Supplement: s1 [file s1]

# Agro-industrial wastes: a substrate for multi-enzymes production by *Cryphonectria parasitica*

Salvatore Savino <sup>1</sup>, Daniela Bulgari <sup>2,\*</sup>, Eugenio Monti <sup>1,^</sup> and Emanuela Gobbi <sup>2,^</sup>

<sup>1</sup>Unit of Biotechnology, Department of Molecular and Translational Medicine (DMMT), University of Brescia, viale Europa 11, Brescia 25123, Italy; s.savino@unibs.it; [eugenio.monti@unibs.it](mailto:eugenio.monti@unibs.it)

<sup>2</sup>Agri-food and Environmental Microbiology Platform (PiMiAA), Department of Molecular and Translational Medicine, University of Brescia, viale Europa 11, Brescia 25123, Italy; [emanuela.gobbi@unibs.it](mailto:emanuela.gobbi@unibs.it)

\*Correspondence: daniela.bulgari@unibs.it; viale Europa, 11, 25123, Brescia, Italy

^co-last authors

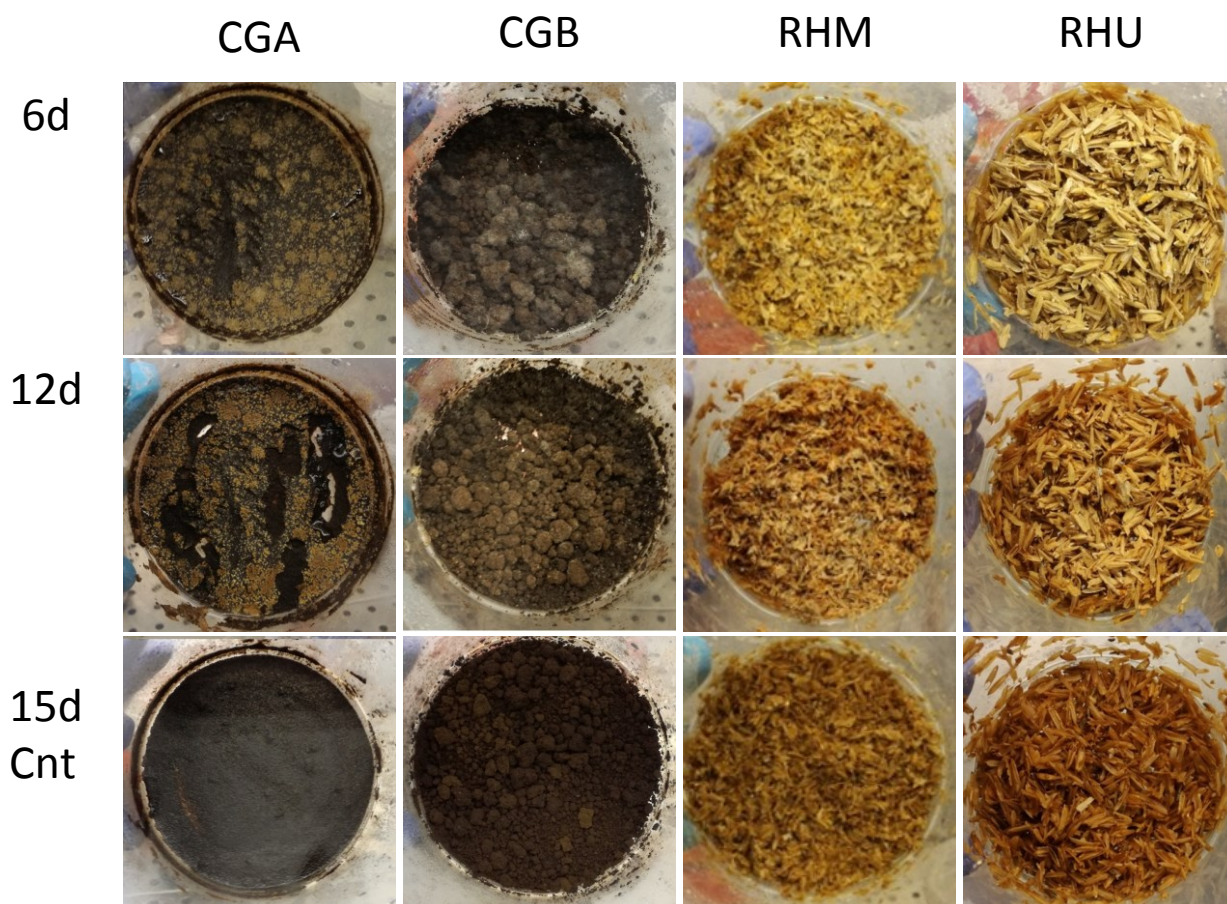

**Figure S1.** Growth of CpC7 strain under SSF using as solid substrate spent coffee grounds (CGA and CGB) and rice husk (RHM and RHU). Cnt, not inoculated substrate (negative control).
