# Supplementary material for: Agro-Industrial Wastes: A Substrate for Multi-Enzymes Production by Cryphonectria parasitica
Source: MDPI journal article supplement (doi:10.3390/fermentation7040279), 2021-11-26
Supplement: s1 [file s1]

# Agro-industrial wastes: a substrate for multi-enzymes production by *Cryphonectria parasitica*

Salvatore Savino <sup>1</sup>, Daniela Bulgari <sup>2,\*</sup>, Eugenio Monti <sup>1,^</sup> and Emanuela Gobbi <sup>2,^</sup>

<sup>1</sup> Unit of Biotechnology, Department of Molecular and Translational Medicine (DMMT), University of Brescia, viale Europa 11, Brescia 25123, Italy; s..savino@unibs.it; eugenio.monti@unibs.it

<sup>2</sup> Agri-food and Environmental Microbiology Platform (PiMiAA), Department of Molecular and Translational Medicine, University of Brescia, viale Europa 11, Brescia 25123, Italy; emanuela.gobbi@unibs.it

\* Correspondence: daniela.bulgari@unibs.it; viale Europa, 11, 25123, Brescia, Italy

<sup>^</sup> co-last authors

**Table S1.** Total protein content of crude extract of four *C. parasitica* environmental strains (CpA, CpB2, CpC4, CpC7), at different time points of fermentation, grown on ZW for 15 days. Data represent the average  $\pm$  standard deviation of biological replicate cultures (n = 3).

| Fermentation time (days) | Protein Concentration (mg/mL) |                   |                   |                   |
|--------------------------|-------------------------------|-------------------|-------------------|-------------------|
|                          | CpA                           | CpB2              | CpC4              | CpC7              |
| Days 6                   | 0.138 $\pm$ 0.012             | 0.126 $\pm$ 0.013 | 0.130 $\pm$ 0.004 | 0.124 $\pm$ 0.006 |
| Days 9                   | 0.145 $\pm$ 0.002             | 0.136 $\pm$ 0.009 | 0.143 $\pm$ 0.001 | 0.137 $\pm$ 0.002 |
| Days 12                  | 0.162 $\pm$ 0.006             | 0.173 $\pm$ 0.009 | 0.165 $\pm$ 0.017 | 0.155 $\pm$ 0.015 |
| Days 15                  | 0.179 $\pm$ 0.005             | 0.190 $\pm$ 0.004 | 0.196 $\pm$ 0.005 | 0.184 $\pm$ 0.007 |
