# Supplementary material for: Agro-Industrial Wastes: A Substrate for Multi-Enzymes Production by Cryphonectria parasitica
Source: MDPI journal article supplement (doi:10.3390/fermentation7040279), 2021-11-26
Supplement: s1 [file s1]

# Agro-industrial wastes: a substrate for multi-enzymes production by *Cryphonectria parasitica*

Salvatore Savino <sup>1</sup>, Daniela Bulgari <sup>2,\*</sup>, Eugenio Monti <sup>1,^</sup> and Emanuela Gobbi <sup>2,^</sup>

<sup>1</sup>Unit of Biotechnology, Department of Molecular and Translational Medicine (DMMT), University of Brescia, viale Europa 11, Brescia 25123, Italy; s.savino@unibs.it; [eugenio.monti@unibs.it](mailto:eugenio.monti@unibs.it)

<sup>2</sup>Agri-food and Environmental Microbiology Platform (PiMiAA), Department of Molecular and Translational Medicine, University of Brescia, viale Europa 11, Brescia 25123, Italy; [emanuela.gobbi@unibs.it](mailto:emanuela.gobbi@unibs.it)

\*Correspondence: daniela.bulgari@unibs.it; viale Europa, 11, 25123, Brescia, Italy

^co-last authors

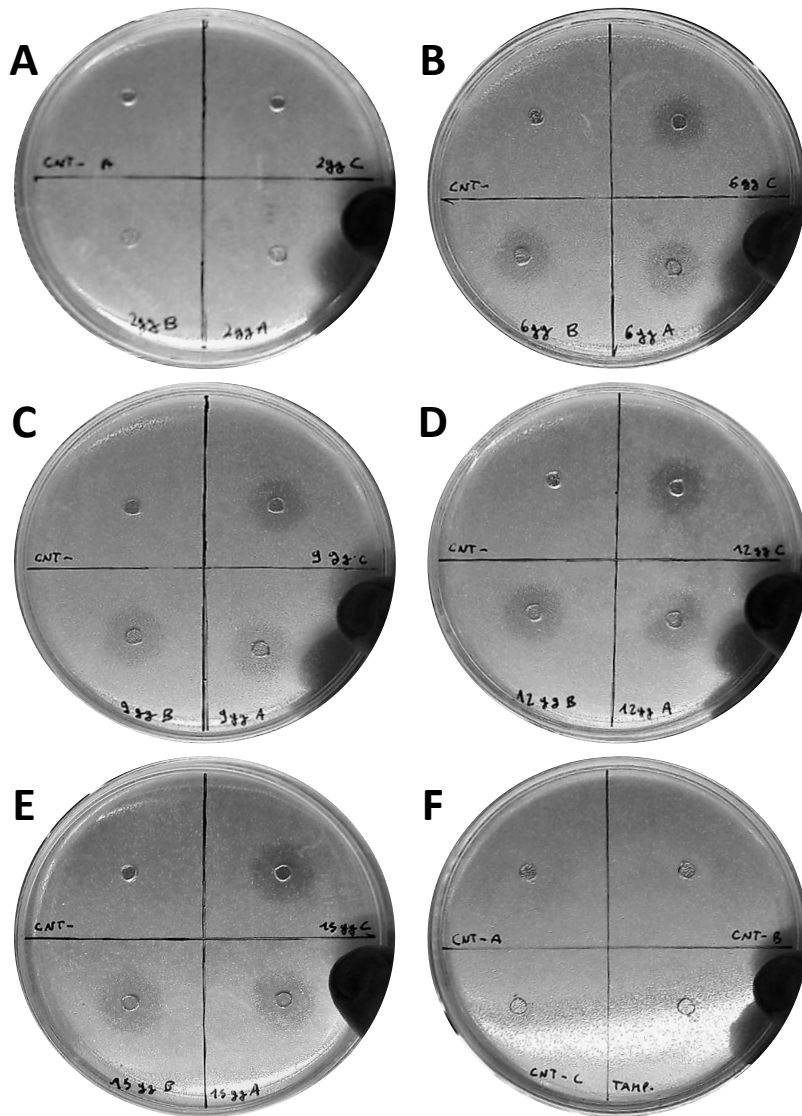

**Figure S2.** Preliminary evaluation of lipolytic activity by TBA assay. It showing zone of hydrolysis evidenced a transparent halo around the disks with fungal crude extracts starting at day 6 (B) and increased with the age of the cultures day 9, 12, 15 (respectively C, D, E); no transparent halo around in the samples corresponding to day 2 (A) and negative control not inoculated substrate (F).
